# Supplementary material for: A comparative analysis of the intestinal metagenomes present in guinea pigs (Cavia porcellus) and humans (Homo sapiens)
Source: PubMed Central journal article supplement (PMC3472315; doi:10.1186/1471-2164-13-514), 2012-09-28
Supplement: 1471-2164-13-514-S3.pdf [file 1471-2164-13-514-S3.pdf]

### Supplementary Figure 3

*C. porcellus*

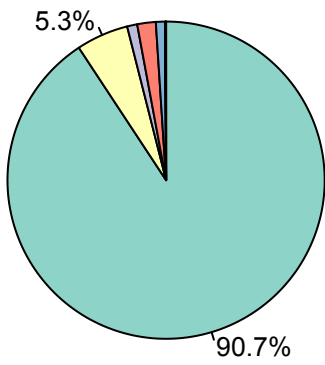

*H. sapiens*

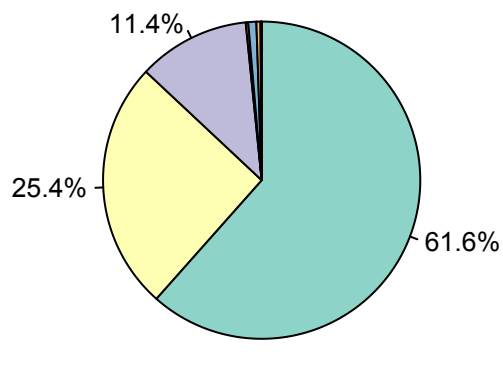

- unclassified
- Bacteroidetes
- Firmicutes
- Verrucomicrobia
- Proteobacteria
- Actinobacteria
- Euryarchaeota
- Fusobacteria
- other
